# Supplementary material for: Guest removal from ring-banded guanidinium organosulfonate hydrogen-bonded frameworks
Source: Royal Society of Chemistry journal article supplement (doi:10.1039/d5nr00467e), 2025-01-01
Supplement: d5nr00467e2.pdf [file d5nr00467e2.pdf]

Supporting Information for

## Guest Removal from Ring-Banded Guanidinium Organosulfonate Hydrogen-Bonded Frameworks

Rochelle B. Spencer,<sup>a</sup> Anna Yusov,<sup>a</sup> Alexandra M. Dillon,<sup>a</sup> Akash Tiwari,<sup>a</sup> Oriol Arteaga,<sup>b</sup> Sophia Sburlati,<sup>a</sup> St. John Whittaker,<sup>a</sup> Wantong Wu,<sup>a</sup> Sixian Chen,<sup>a</sup> Alexander G. Shtukenberg,<sup>a</sup> Michael D. Ward,<sup>\*a</sup> Bart Kahr<sup>\*a</sup> and Stephanie S. Lee<sup>\*a</sup>

<sup>a</sup>Molecular Design Institute, Department of Chemistry, New York University, New York, NY 10003, USA

<sup>b</sup>Department of Applied Physics, University of Barcelona, 08028 Barcelona, Spain

\*mdw3@nyu.edu, bk66@nyu.edu, stephlee@nyu.edu

**Video S1.** Brightfield video of a (G)<sub>2</sub>(1,5-NDS)⊃EtOH single crystal undergoing a transition upon heating at 130°C.

**Video S2.** Frame-by-frame optical micrographs of the recrystallization process upon heating a (G)<sub>2</sub>(1,5-NDS)⊃EtOH banded spherulite film between crossed polarizers. Time-lapse videos of optical micrographs were created in Fiji and frames were stabilized with the StackReg macro plugin.

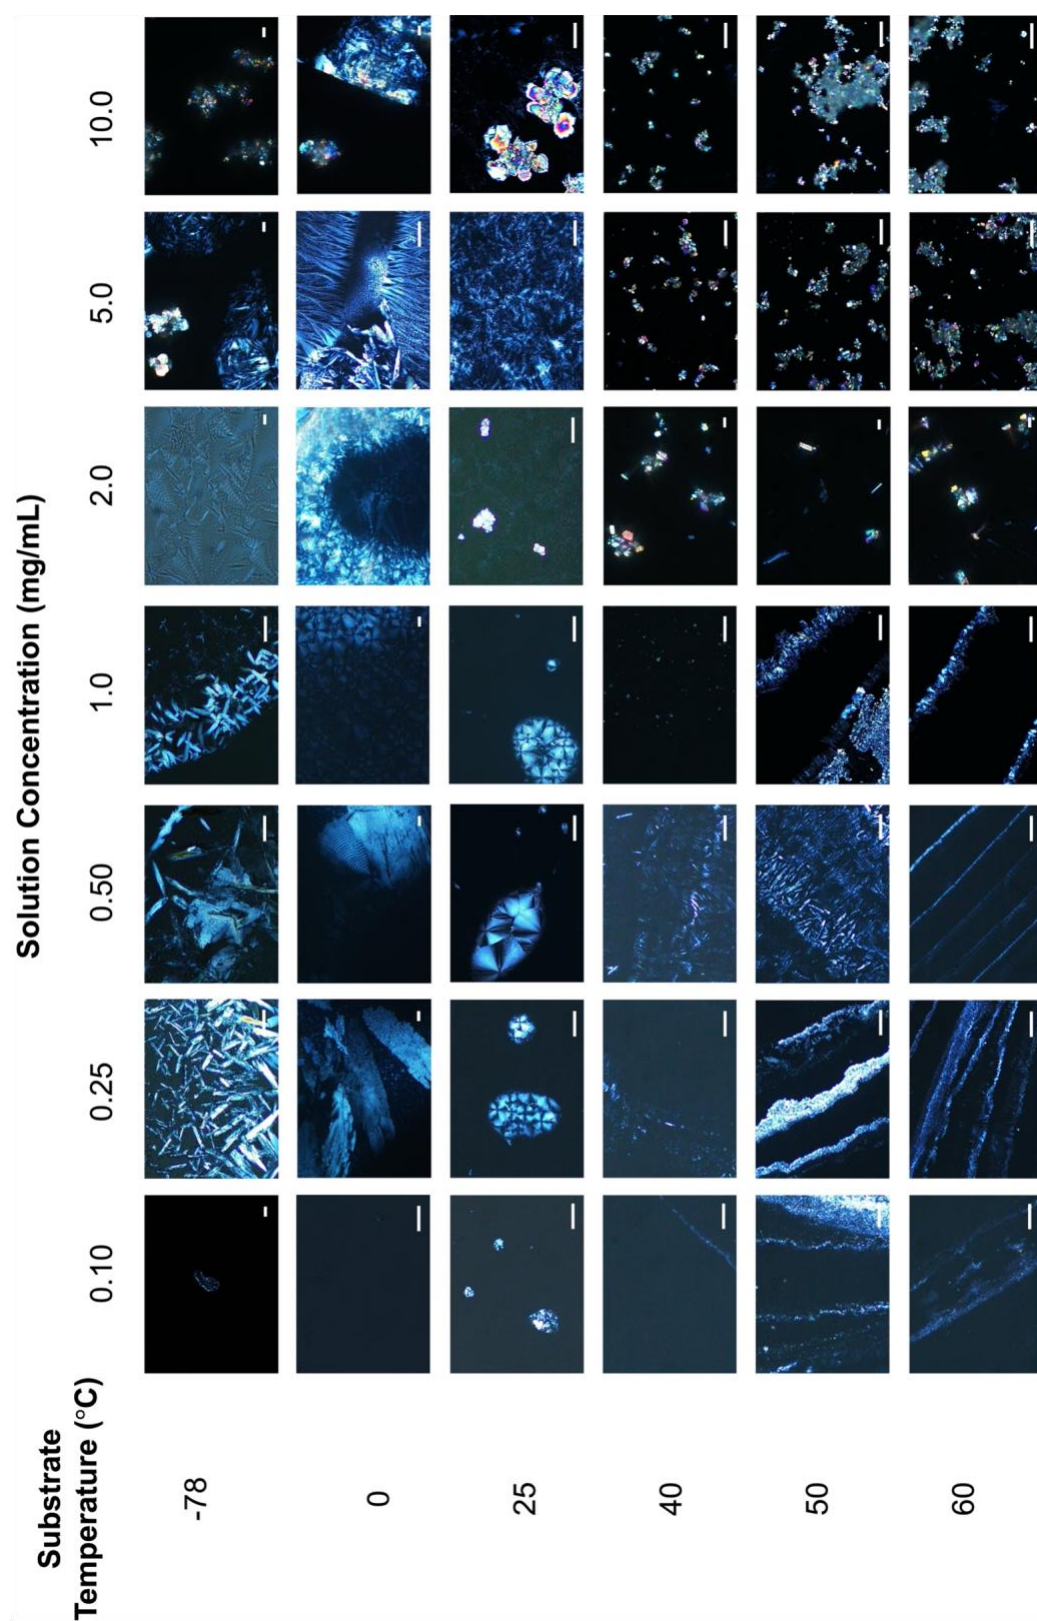

**Figure S1.** Optical micrographs of  $(G)_2(1,5\text{-NDS})$  films grown from ethanol solution between crossed polarizers at various solution concentrations and substrate temperatures. Scale bar = 50  $\mu\text{m}$ .

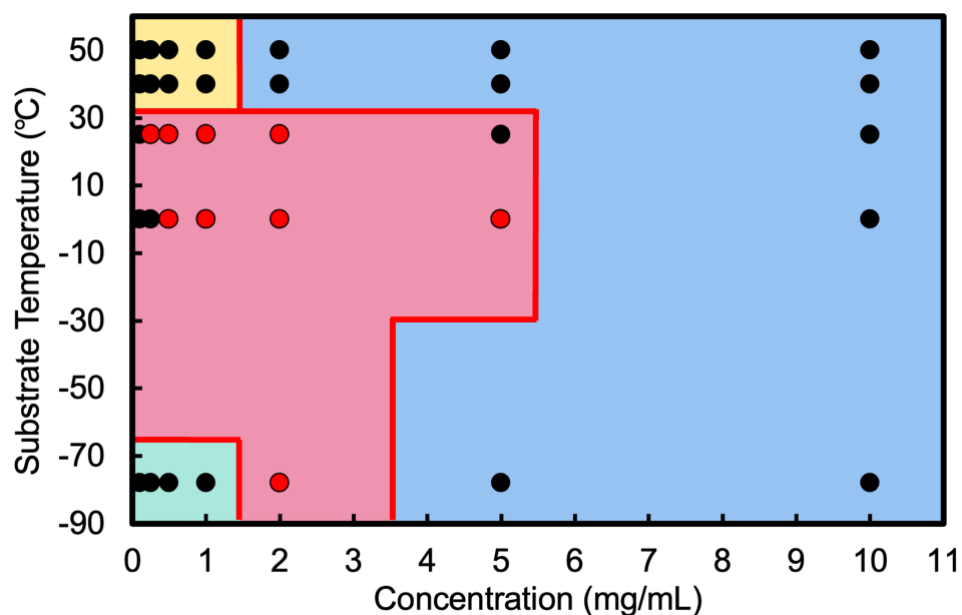

**Figure S2.** Color map correlating solution concentration and substrate temperature with  $(G)_2(1,5\text{-NDS})$  film morphologies: (a) coffee rings of small crystalline aggregates (yellow), (b) spherulites (red), (c) needle-like crystals (green), and (d) large crystalline aggregates (blue). Red data points represent banded spherulites.

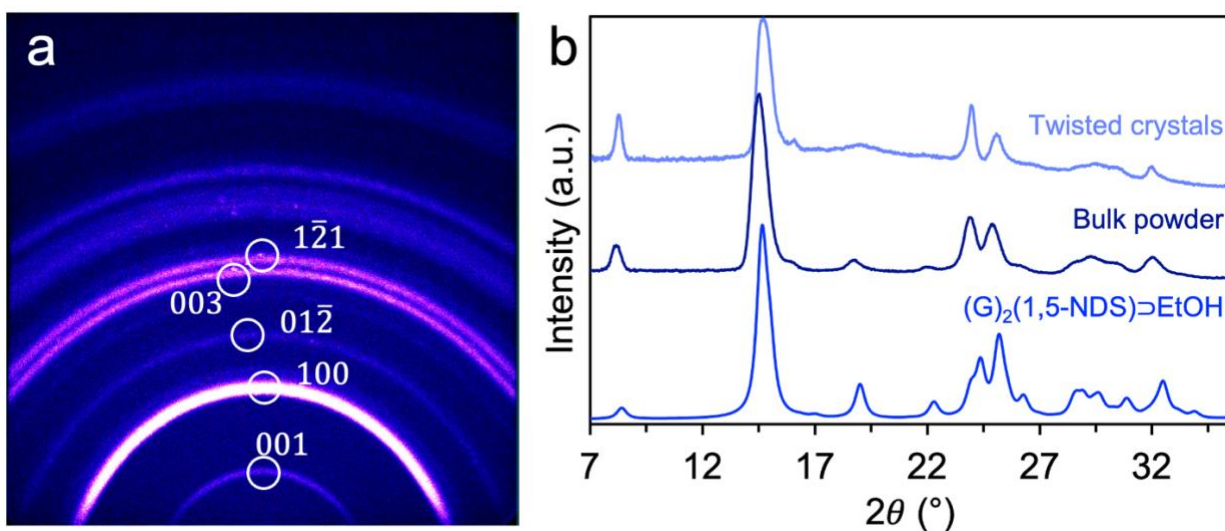

**Figure S3.** (a) 2-D XRD pattern of  $(G)_2(1,5\text{-NDS})\supset\text{EtOH}$  bulk powder. (b) 1-D line scans extracted from the 2-D diffraction patterns for  $(G)_2(1,5\text{-NDS})\supset\text{EtOH}$  twisted crystals and  $(G)_2(1,5\text{-NDS})\supset\text{EtOH}$  bulk powder loaded into Kapton capillary tubes. The simulated powder XRD pattern of experimentally determined  $(G)_2(1,5\text{-NDS})\supset\text{EtOH}$  are provided for comparison.

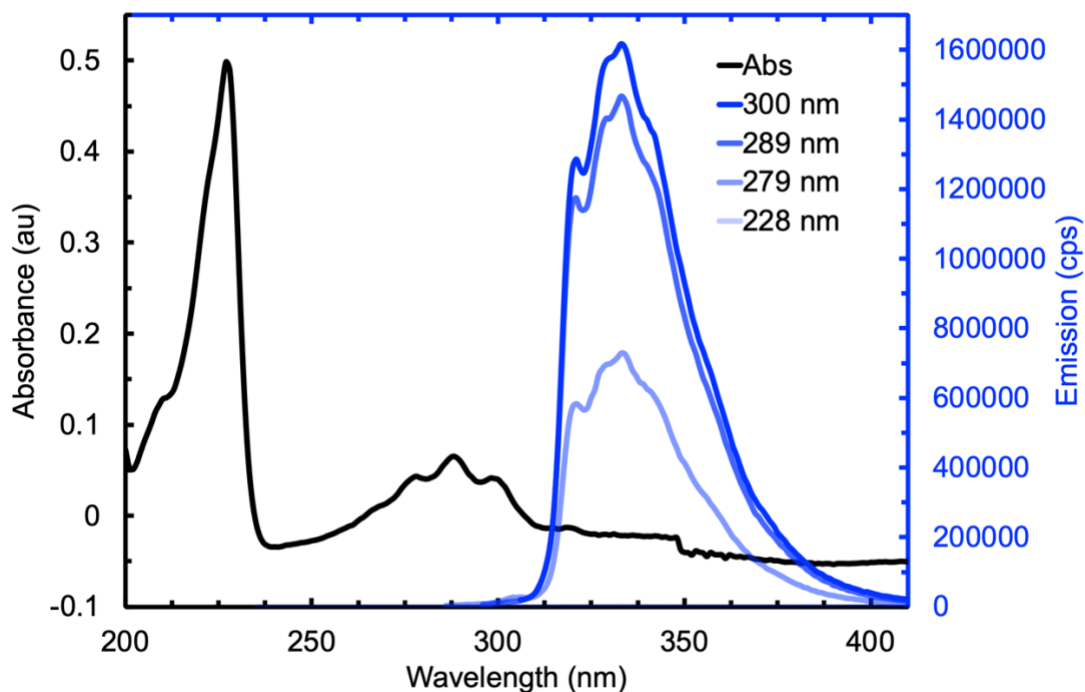

**Figure S4.** Absorbance and emission spectra at different excitation wavelengths for  $(G)_2(1,5\text{-NDS})$  dissolved in ethanol.

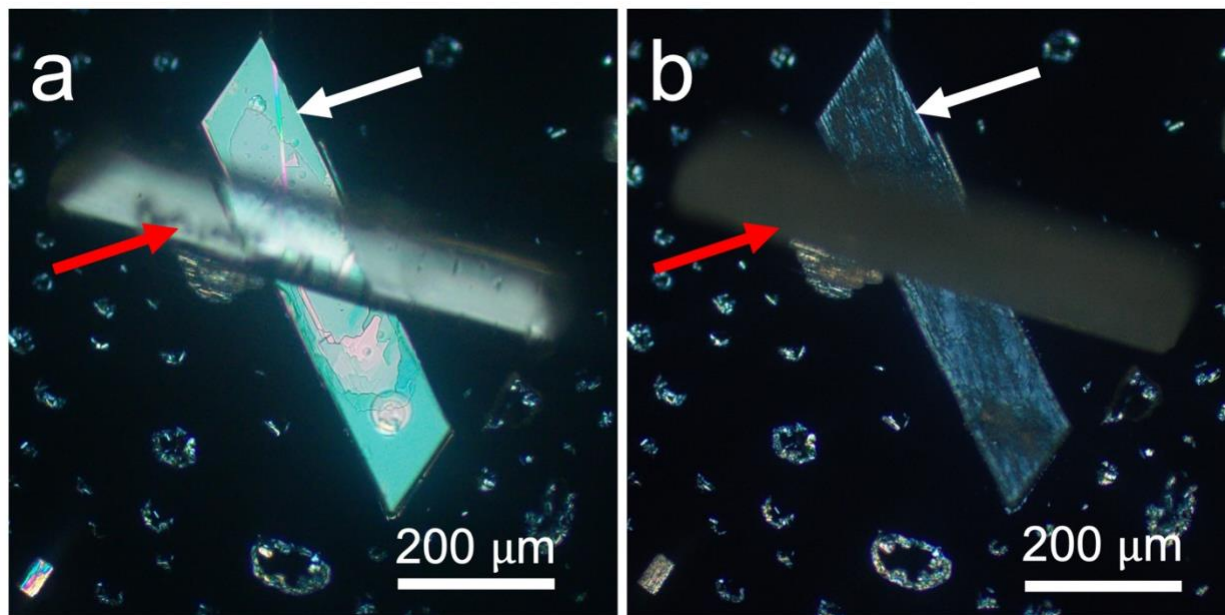

**Figure S5.** (a, b) Optical micrographs of a  $(G)_2(1,5\text{-NDS}) \cdot \text{EtOH}$  single crystal between crossed polarizers before and after ethanol guest removal at 130°C, respectively. The white arrow highlights a thin single crystal exhibiting few domains that transformed with loss of retardance. The red arrow indicates a thick single crystal exhibiting multiple domains that decomposed, became dark because of strong scattering, and lost all phase information upon guest removal.



**Table S1.** Detailed crystallographic data for (G)<sub>2</sub>(1,5-NDS)⊃EtOH and (G)<sub>2</sub>(1,5-NDS) collected at 100 K

| Compound name                                               | (G) <sub>2</sub> (1,5-NDS)⊃EtOH                                              | (G) <sub>2</sub> (1,5-NDS)                                                   |
|-------------------------------------------------------------|------------------------------------------------------------------------------|------------------------------------------------------------------------------|
| Lab code                                                    | 23mdw12ay                                                                    | 23mdw35ay                                                                    |
| CCDC no.                                                    | 2419508                                                                      | -                                                                            |
| Formula by X-ray                                            | C <sub>14</sub> H <sub>24</sub> N <sub>6</sub> O <sub>7</sub> S <sub>2</sub> | C <sub>12</sub> H <sub>18</sub> N <sub>6</sub> O <sub>6</sub> S <sub>2</sub> |
| Formula weight                                              | 452.51                                                                       | 406.44                                                                       |
| Crystal habit                                               | colorless plate                                                              | cloudy colorless prism                                                       |
| Crystal size (mm)                                           | 0.430 x 0.370 x 0.110                                                        | 0.886 x 0.471 x 0.190                                                        |
| Crystal system                                              | triclinic                                                                    | monoclinic                                                                   |
| Space group (no.)                                           | <i>P</i> $\bar{1}$                                                           | <i>P</i> 2 <sub>1</sub> / <i>c</i>                                           |
| <i>a</i> (Å)                                                | 7.2940(3)                                                                    | 11.359(5)                                                                    |
| <i>b</i> (Å)                                                | 7.2975(3)                                                                    | 9.285(4)                                                                     |
| <i>c</i> (Å)                                                | 11.5957(5)                                                                   | 9.048(4)                                                                     |
| $\alpha$ (°)                                                | 100.0921(15)                                                                 | 90                                                                           |
| $\beta$ (°)                                                 | 95.3125(14)                                                                  | 101.453(12)                                                                  |
| $\gamma$ (°)                                                | 118.9930(13)                                                                 | 90                                                                           |
| <i>V</i> (Å <sup>3</sup> )                                  | 520.096                                                                      | 935.276                                                                      |
| <i>Z</i>                                                    | 1                                                                            | 2                                                                            |
| <i>D<sub>c</sub></i> (g cm <sup>-3</sup> )                  | 1.445                                                                        | 1.443                                                                        |
| <i>F</i> (000)                                              | 238.0                                                                        | 424.0                                                                        |
| $\mu$ (mm <sup>-1</sup> )                                   | 0.305                                                                        | 0.326                                                                        |
| Total reflections                                           | 15215                                                                        | 2443                                                                         |
| Unique reflections                                          | 2576                                                                         | 640                                                                          |
| <i>R</i> <sub>int</sub>                                     | 0.0327                                                                       | 0.0953                                                                       |
| <i>R</i> <sub>1</sub> [ <i>I</i> > 2 $\sigma$ ( <i>I</i> )] | 0.0325                                                                       | 0.1106                                                                       |
| <i>wR</i> <sub>2</sub> (all data)                           | 0.0946                                                                       | 0.2229                                                                       |
| GOF (all data)                                              | 1.085                                                                        | 1.386                                                                        |

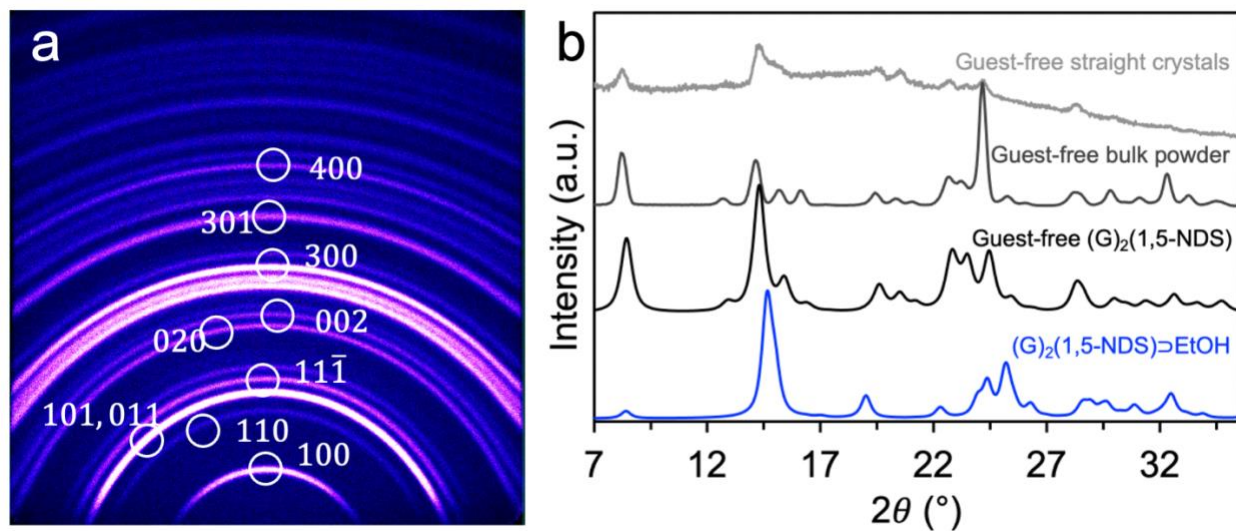

**Figure S6.** (a) 2-D XRD pattern of guest-free (G)<sub>2</sub>(1,5-NDS) bulk powder. (b) 1-D line scans extracted from the 2-D diffraction patterns of guest-free (G)<sub>2</sub>(1,5-NDS) straight crystals and guest-free (G)<sub>2</sub>(1,5-NDS) bulk powder loaded into Kapton capillary tubes. The simulated powder XRD patterns of experimentally determined guest-free (G)<sub>2</sub>(1,5-NDS) and (G)<sub>2</sub>(1,5-NDS)⊃EtOH are provided for comparison.

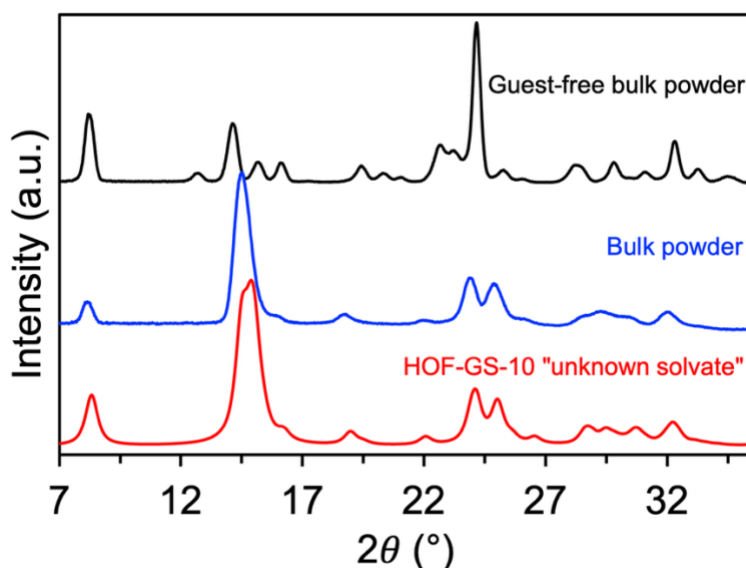

**Figure S7.** Comparison of 1-D line scans extracted from the 2-D diffraction patterns of  $(G)_2(1,5\text{-NDS})\supset\text{EtOH}$  bulk powder and guest-free  $(G)_2(1,5\text{-NDS})$  bulk powder with the simulated powder XRD pattern of experimentally determined HOF-GS-10 “unknown solvate”.

**Table S2.** Comparison of crystallographic data for  $(G)_2(1,5\text{-NDS})\supset\text{EtOH}$ ,  $(G)_2(1,5\text{-NDS})$  and HOF-GS-10.

| Compound name               | $(G)_2(1,5\text{-NDS})\supset\text{EtOH}$ | $(G)_2(1,5\text{-NDS})$ | HOF-GS-10               |
|-----------------------------|-------------------------------------------|-------------------------|-------------------------|
| CCDC no.                    | 2419508                                   | -                       | 1473368                 |
| Formula by X-ray            | $C_{14}H_{24}N_6O_7S_2$                   | $C_{12}H_{18}N_6O_6S_2$ | $C_{12}H_{18}N_6O_6S_2$ |
| Formula weight              | 452.51                                    | 406.44                  | 406.44                  |
| Crystal habit               | colorless plate                           | cloudy colorless prism  | colorless rod           |
| Crystal size (mm)           | 0.430 x 0.370 x 0.110                     | 0.886 x 0.471 x 0.190   | 0.13 x 0.11 x 0.10      |
| Crystal system              | triclinic                                 | monoclinic              | triclinic               |
| Space group (no.)           | $P\bar{1}$                                | $P2_1/c$                | $P\bar{1}$              |
| $a$ (Å)                     | 7.2940(3)                                 | 11.359(5)               | 7.2631(10)              |
| $b$ (Å)                     | 7.2975(3)                                 | 9.285(4)                | 7.3084(11)              |
| $c$ (Å)                     | 11.5957(5)                                | 9.048(4)                | 11.6934(17)             |
| $\alpha$ (°)                | 100.0921(15)                              | 90                      | 74.902(4)               |
| $\beta$ (°)                 | 95.3125(14)                               | 101.453(12)             | 84.809(4)               |
| $\gamma$ (°)                | 118.9930(13)                              | 90                      | 60.567(4)               |
| $V$ (Å <sup>3</sup> )       | 520.096                                   | 935.276                 | 521.41(13)              |
| $Z$                         | 1                                         | 2                       | 1                       |
| $D_c$ (g cm <sup>-3</sup> ) | 1.445                                     | 1.443                   | 1.294                   |

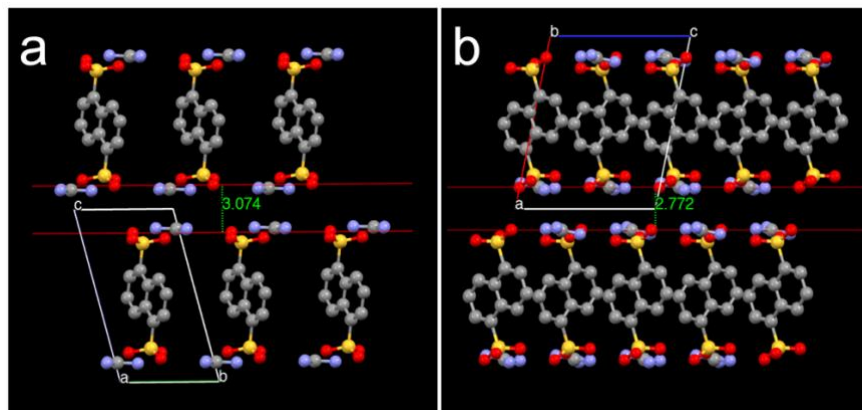

**Figure S8.** Molecular packing highlighting the distance between adjacent bilayers in (a)  $(G)_2(1,5\text{-NDS})\supset\text{EtOH}$  and (b)  $(G)_2(1,5\text{-NDS})$  as 3.074 Å and 2.772 Å, respectively, as measured by the distance between a plane constructed through the closest oxygen atoms in each bilayer. Hydrogen atoms are hidden for clarity.

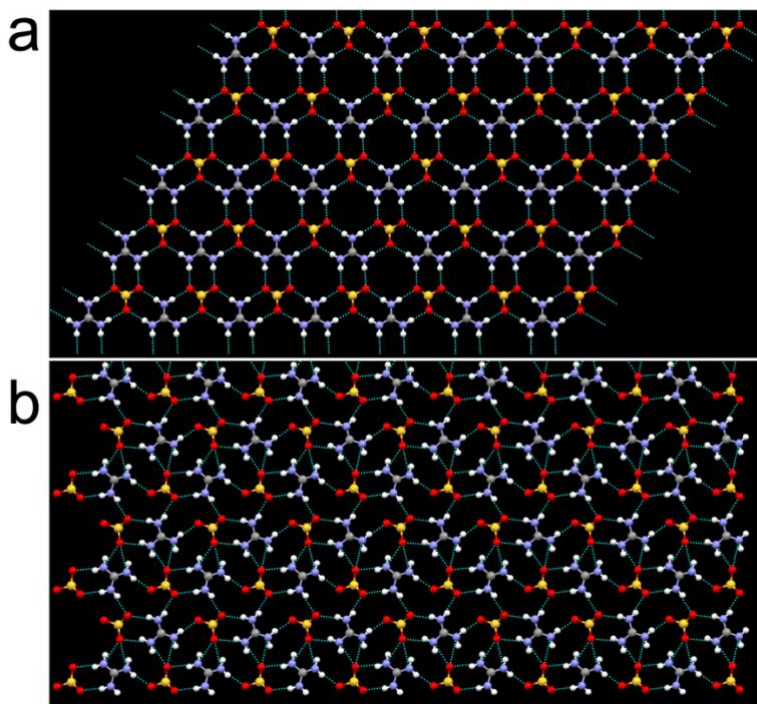

**Figure S9.** (a, b) Hydrogen-bonding interactions in GS sheets of  $(G)_2(1,5\text{-NDS})\supset\text{EtOH}$  and  $(G)_2(1,5\text{-NDS})$ . Unlike  $(G)_2(1,5\text{-NDS})\supset\text{EtOH}$ ,  $(G)_2(1,5\text{-NDS})$  exhibits a distorted quasi-hexagonal GS sheet. In  $(G)_2(1,5\text{-NDS})$ , G cations and S anions retain the 6 strong hydrogen bonds ( $d(\text{N}\cdots\text{O}) = 2.869, 2.889, 2.929, 2.952, 2.968, 3.038$  Å), albeit the magnitudes of these hydrogen bonding interactions differ slightly in  $(G)_2(1,5\text{-NDS})\supset\text{EtOH}$  ( $d(\text{N}\cdots\text{O}) = 2.900, 2.912, 2.927, 2.927, 2.937, 2.948$  Å). One pair of G protons on adjacent nitrogen atoms is hydrogen-bonded to a single S oxygen atom. While  $(G)_2(1,5\text{-NDS})\supset\text{EtOH}$  has each G cation bound to only 3 S anions, each G cation is bound to 4 S anions in  $(G)_2(1,5\text{-NDS})$ . Hydrogen bonds in  $(G)_2(1,5\text{-NDS})$  are slightly longer on average (2.941 vs. 2.925 Å) than in the  $(G)_2(1,5\text{-NDS})\supset\text{EtOH}$  structure, and their geometry appears to be much less favorable: N-H $\cdots$ O angles in  $(G)_2(1,5\text{-NDS})$  are 167.25°, 145.57°, 147.47°, 145.70°, 156.86°, and 161.66°, compared to N-H $\cdots$ O angles of 163.11°, 165.15°, 174.47°, 160.58°, 159.45°, and 170.42° in the  $(G)_2(1,5\text{-NDS})\supset\text{EtOH}$  structure.



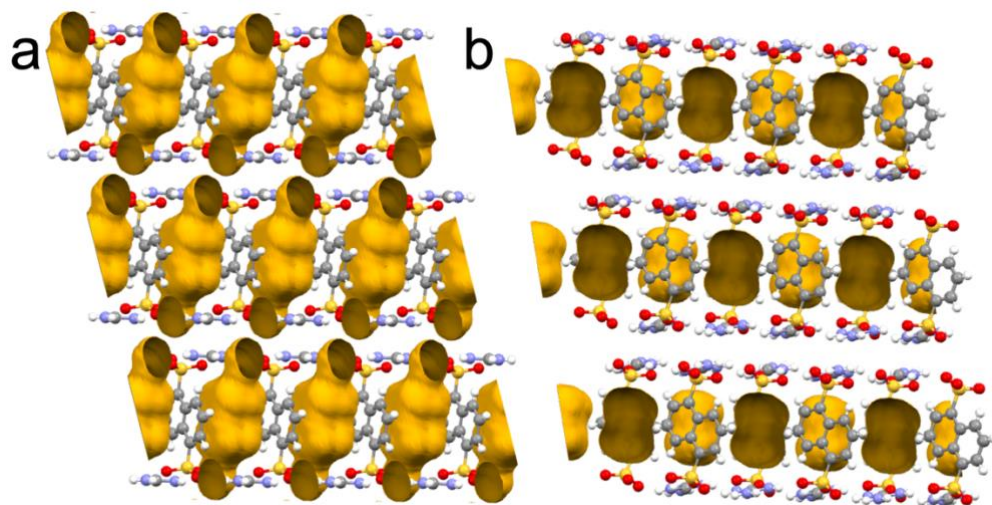

**Figure S10.** Visualization of the calculated void spaces (yellow cavities) in (a)  $(G)_2(1,5\text{-NDS})\supset\text{EtOH}$  with ethanol computationally removed compared to (b)  $(G)_2(1,5\text{-NDS})$ . The voids are 19.6% and 9.7% of the unit cell volume, affording void volumes of  $101.95 \text{ \AA}^3$  and  $90.82 \text{ \AA}^3$ , respectively (grid spacing =  $0.3 \text{ \AA}$ , probe radius =  $1.2 \text{ \AA}$ ).

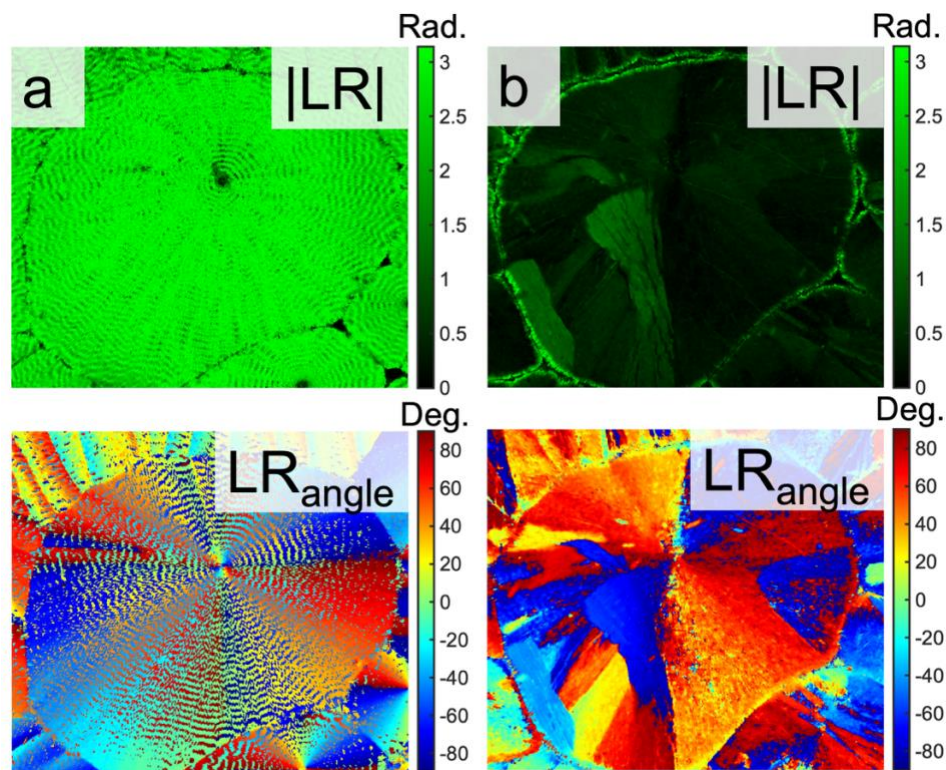

**Figure S11.** Linear retardance ( $|LR|$ ) map and angle-dependent linear retardance ( $LR_{\text{angle}}$ ) map measured in degrees counterclockwise from the horizontal direction (a) before and (b) after guest removal from  $(G)_2(1,5\text{-NDS})\supset\text{EtOH}$  banded spherulite films.  $\lambda = 455 \text{ nm}$ .



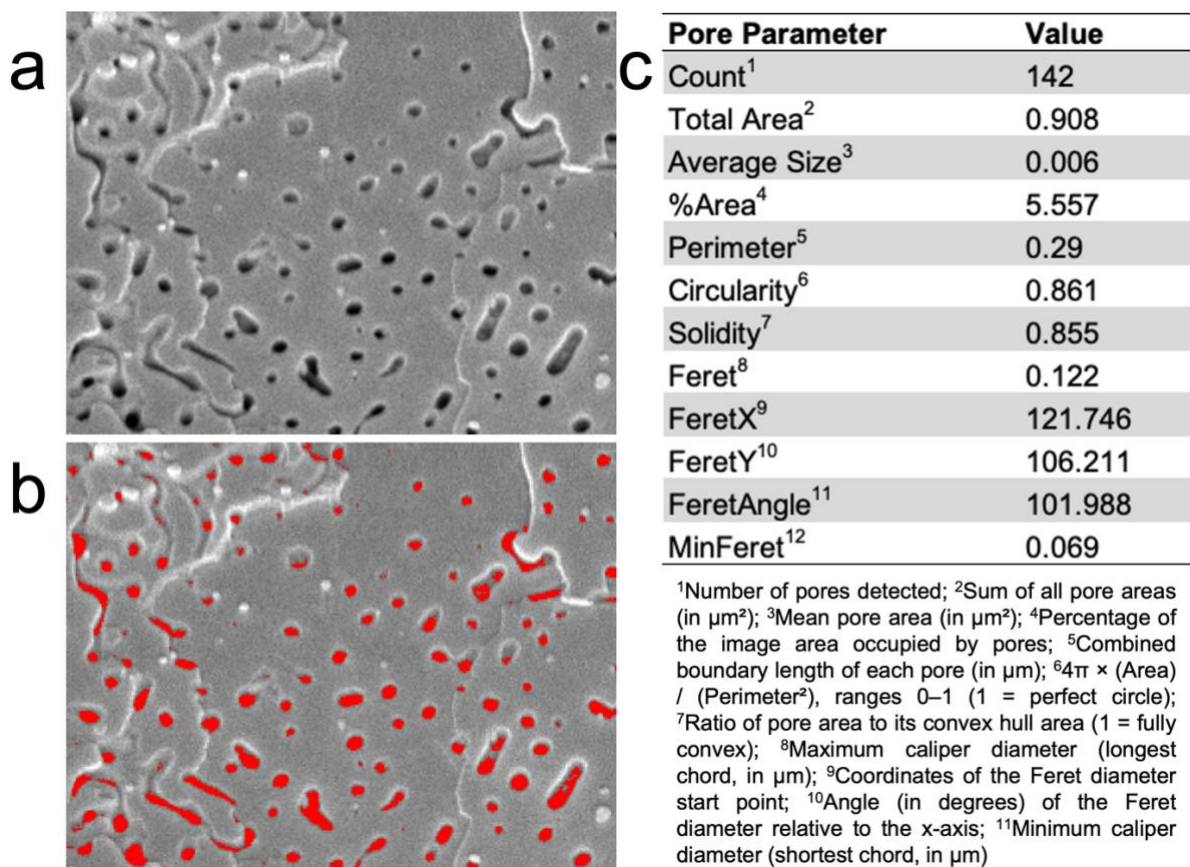

**Figure S12.** (a) SEM cross-section of a guest-free (G)<sub>2</sub>(1,5-NDS) film, (b) cross-section of the film with pores shaded in red, and (c) tabular summary of measurements obtained from pore analysis conducted using Fiji software.
